# Supplementary material
Source: publisher site journal article supplement (https://www.spandidos-publications.com/8154/downloadSupplementary)

Figure S1. Flow cytometry (A) plots and (B) analysis demonstrating that PUM2 knockdown did not significantly affect apoptosis at 48 h post-transfection. NC, negative control; DSI, dicer-substrate small interfering RNA; ns, not significant; PE-H, phycoerythrin fluorescence height; APC-H, allophycocyanin height.

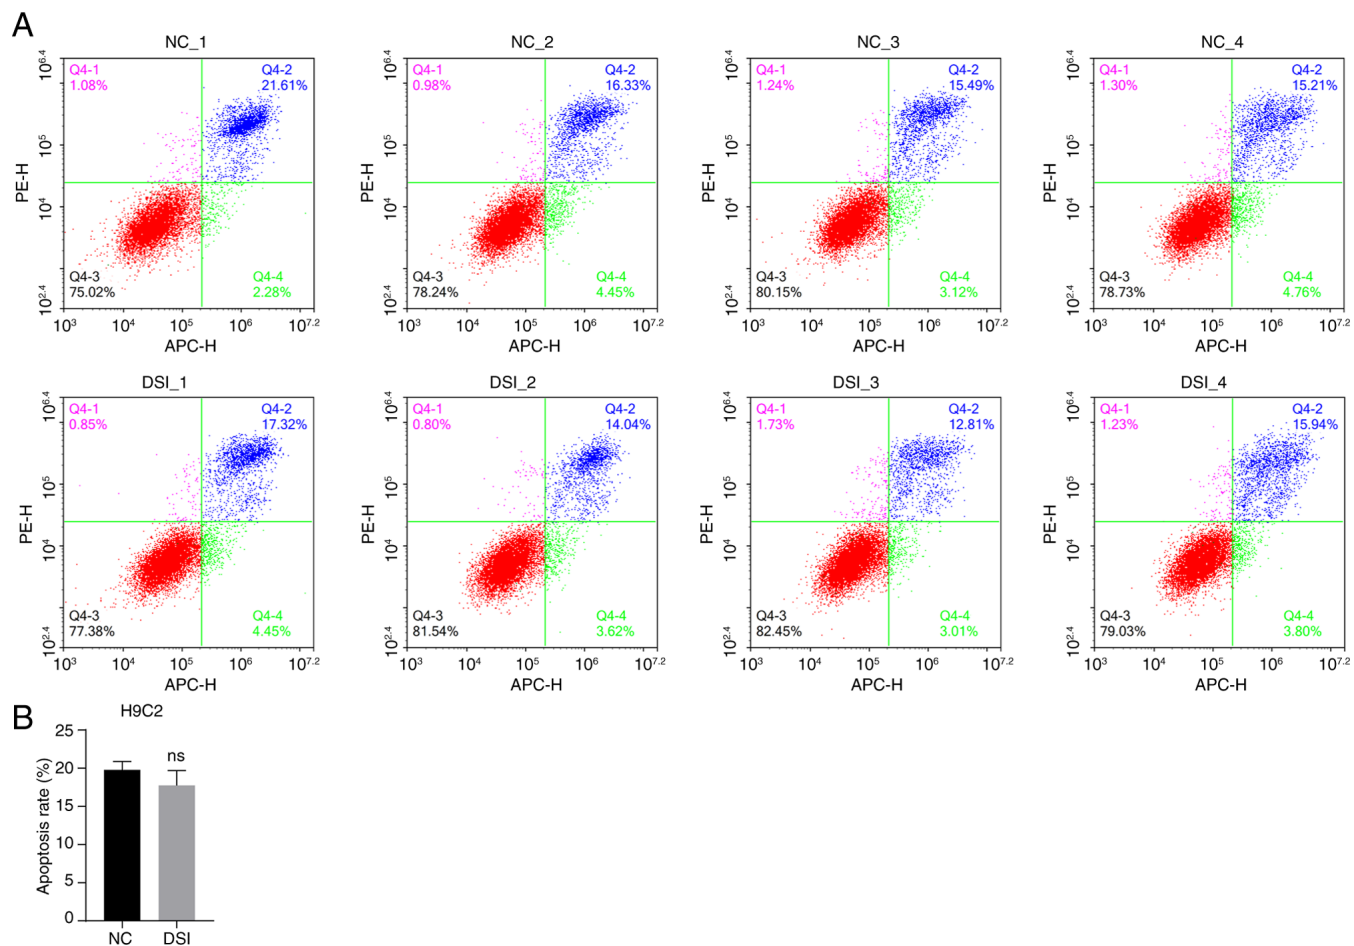

Figure S2. Bar plot showing the enriched GO terms of upregulated and downregulated differentially expressed genes. GO, Gene Ontology.

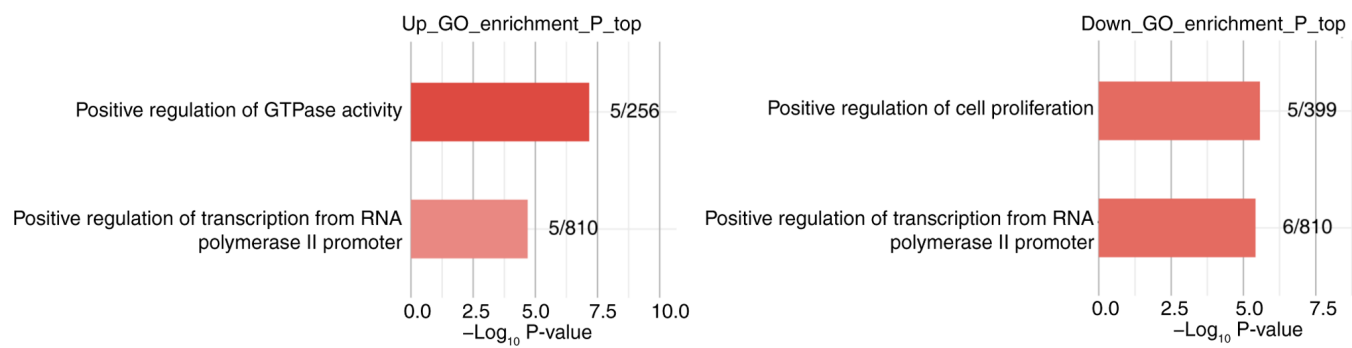

Figure S3. Reads distribution diagram showing Ppfibp1 (ES) and bar plots showing splicing ratio of Ppfibp1 (ES) and quantitative PCR validation. \* $P \leq 0.05$  and \*\*\*\* $P < 0.0001$ . Ppfibp1, PPFIA binding protein 1; AS, alternative splicing; ES, exon skipping; chr4, chromosome 4; NC, negative control; DSI, dicer-substrate small interfering RNA; PUM2, pumilio RNA-binding family member 2.

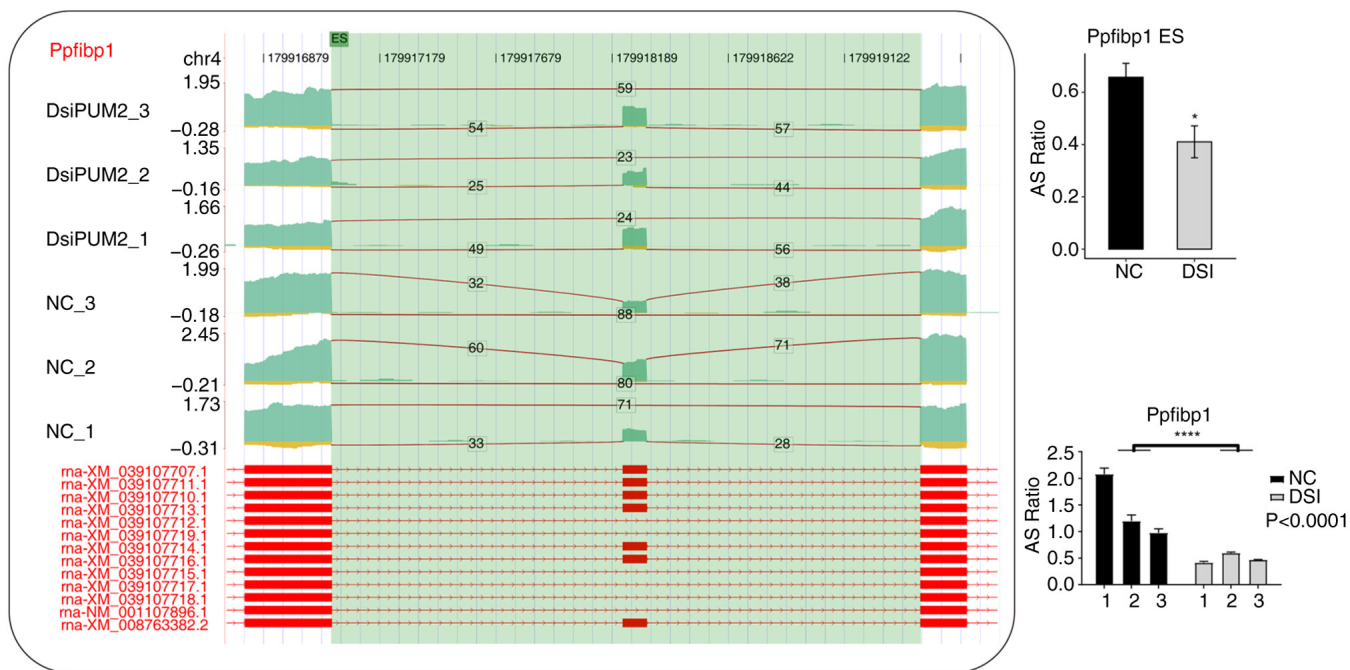

Supplement: Supplementary file 1 [file downloadSupplementary]
